# DNA-encoded immunoassay in picoliter drops: a minimal cell-free approach

Barbara Jacková,<sup>1,2</sup> Guillaume Mottet,<sup>2,\*</sup> Sergii Rudiuk,<sup>1</sup> Mathieu Morel,<sup>1,\*</sup> Damien Baigl<sup>1,\*</sup>

<sup>1</sup> PASTEUR, Department of Chemistry, École Normale Supérieure, PSL University, Sorbonne Université, CNRS, 75005 Paris, France

<sup>2</sup> Large Molecules Research Platform, Sanofi, 94400 Vitry-sur-Seine, France

\* correspondence to: [damien.baigl@ens.psl.eu](mailto:damien.baigl@ens.psl.eu), [mathieu.morel@ens.psl.eu](mailto:mathieu.morel@ens.psl.eu), [guillaume.mottet@sanofi.com](mailto:guillaume.mottet@sanofi.com)

## Abstract

Based on the remarkably specific antibody-antigen interaction, immunoassays have emerged as indispensable bioanalytical tools for both fundamental research and biomedical applications but necessitate long preliminary steps for the selection, production and purification of the antibody(ies) to be used. Here, we adopt a paradigm shift exploring the concept of creating a rapid and purification-free assay where the antibody is replaced by its coding DNA as a starting material, while exploiting a drop microfluidic format to dramatically decrease sample volume and accelerate throughput and sorting capability. The methodology consists in the co-encapsulation of a DNA coding for the variable domain of the heavy chain of heavy-chain only antibodies (VHH), a reconstituted cell-free expression medium, the target antigen and a capture scaffold where VHH:antigen accumulate to create a detectable signal, inside picoliter drop compartments. We first demonstrate successful synthesis of a functional hemagglutinin (HA)-tagged anti-GFP VHH, referred to as NanoGFP, at a high yield ( $15.3 \pm 2.0 \mu\text{g}\cdot\text{mL}^{-1}$ ) in bulk and in less than 3 h using PURExpress cell-free expression medium. We then use a microfluidic device to generate stable water-in-oil drops (30 pL) encapsulating NanoGFP-coding DNA, PURExpress medium, EGFP antigen and HA tag-specific magnetic nanoparticles prior to incubating at 37 °C the resulting emulsion under a magnetic field, inducing both *in situ* synthesis of NanoGFP and accumulation of NanoGFP:EGFP complexes on magnetically assembled particles. This allows us to assess, for the first time and in less than 3 hours, the binding of an antigen to a cell-free synthesized antibody, in a large number of picoliter drops down to a DNA concentration as low as 12 plasmids per drop. We also show that the drops of this immunoassay can be further sequentially analyzed at high throughput (500 Hz), thus offering capability for library screening, sorting and/or rare event detection. We finally demonstrate the versatility of this method by using DNA coding for different VHH (e.g., anti-mCherry protein), by characterizing VHH specificity in the presence of antigen mixtures, and by showing that antigens can be either inherently fluorescent or not. We thus anticipate that the ultraminiaturized format (pL), rapidity (3 h), programmability (DNA-encoded approach) and versatility of this novel immunoassay concept will constitute valuable assets for faster discovery, better understanding and/or expanded applications of antibodies.

## 42 Introduction

43 Immunoassays are ubiquitous bioanalytical techniques, in which the presence of a target  
44 molecule is detected or quantified using antibody-antigen binding interaction.<sup>[1]</sup> Despite  
45 tremendous importance in both fundamental research and real-world applications ranging from  
46 antibody discovery and analyte detection to medical diagnosis,<sup>[2]</sup> their development remains  
47 time-consuming, costly and require dedicated human and instrumental resources. They  
48 necessitate the use of particular antibodies with proper affinity and selectivity against desired  
49 targets, resulting in long steps of antibody screening, production, purification and functionality  
50 characterization.<sup>[3]</sup> Accelerating and simplifying such important biomolecular technique thus  
51 appears as a particularly timely challenge. Microfluidics and lab-on-chip technologies have the  
52 capability to dramatically decrease volume and time of reactions while being biocompatible,  
53 versatile and cost-effective.<sup>[4]</sup> There have thus been many efforts in the past decade to develop  
54 robust microfluidic approaches to implement antibody bioassays in highly miniaturized formats.  
55 Drop microfluidics, which consists in handling, analyzing and sorting chemical and/or  
56 biological components in nano to picoliter monodisperse drops in a high-throughput fashion,  
57 has been identified as one of the most efficient methods to reach this objective.<sup>[5,6]</sup> For instance,  
58 development of a microfluidic platform for compartmentalization, analysis and subsequent  
59 sorting of individual cells<sup>[7]</sup> made possible to conduct studies on immune cells' antibody  
60 secretome that was unexplorable by conventional flow cytometry. This breakthrough enabled  
61 not only better understanding of antibody secretion dynamics<sup>[8]</sup> but also the characterization of  
62 antibody binding properties,<sup>[8,9]</sup> both of which have facilitated the discovery of antibodies with  
63 desired functionality. These achievements had in common to be based on single-cell  
64 encapsulation in drops, with a particular focus on optimizing the methodology to increase the  
65 throughput and sorting capability of the developed microfluidic devices. Handling living cells  
66 was also accompanied by intrinsic constraints to maintain cells alive, such as limited time of  
67 experiments, mild conditions and use of biocompatible reagents. As an interesting  
68 complementary approach, and to further accelerate, diversify and simplify the capability of  
69 microfluidic antibody bioassays, we could think of substituting the confined secreting cell by a  
70 minimal and well-defined expression machinery producing the antibody of interest. So-called  
71 cell-free gene expression systems, in which a protein can be synthesized from coding DNA in  
72 a few hours, have been successfully exploited to synthesize functional proteins within a wide  
73 range of systems and applications.<sup>[10,11]</sup> Beside their versatility and commercial availability, they  
74 are advantageously compatible with cytotoxic protein synthesis, artificial amino acid  
75 incorporations<sup>[12,13]</sup> and new methods of extrinsic expression regulation, such as dynamic  
76 photocontrol.<sup>[14]</sup> By simply using DNA coding for desired sequence, many protein types have  
77 already been synthesized including enzymes,<sup>[15-17]</sup> membrane proteins<sup>[18-21]</sup> or large protein  
78 assemblies.<sup>[22-26]</sup> Interestingly, cell-free expression systems can also be employed in  
79 miniaturized format, successful examples including fluorescent proteins,<sup>[27-29]</sup> enzymes<sup>[30-33]</sup> and  
80 transcriptional regulators.<sup>[34]</sup> In contrast, due to the large size and complex higher structure of  
81 immunoglobulins (IgGs), their synthesis has so far only been achieved in bulk cell-free systems,  
82 after substantial efforts to optimize both antibody-coding DNA sequence and the composition  
83 of cell-free expression medium.<sup>[35-37]</sup> To achieve functional antibody synthesis in minimal  
84 compartments without optimization steps, we could suggest instead to synthesize the variable  
85 domains of the heavy chain of heavy-chain only antibodies (VHH)<sup>[38]</sup> engineered from naturally  
86 occurring antibodies found in camelids. VHH are small-sized (~13 kDa), stable, single-unit and  
87 easily-foldable proteins, originally used as tools for intracellular protein tracking<sup>[39]</sup> or reagents

88 for high-affinity protein purification.<sup>[40]</sup> They nowadays represent a highly promising alternative  
89 to conventional therapeutic antibodies.<sup>[41,42]</sup> To our knowledge, cell-free synthesis of VHH has  
90 up to now only been reported in a bulk format, in particular for antibody discovery purposes,  
91 using techniques of mRNA, ribosome and phage displays.<sup>[43-45]</sup> Here, we propose not only to  
92 express functional VHH in microfluidic drops by cell-free expression from its coding DNA for  
93 the first time, but also to concomitantly, and in the same drops, assess the capability of the  
94 synthesized antibody to selectively capture its target antigen. We first synthesized in bulk an  
95 anti-green fluorescent protein (GFP) VHH, referred to as NanoGFP, using a reconstituted cell-  
96 free expression system and characterized both the synthesis yield and the functionality of the  
97 synthesized VHH. By co-encapsulating coding DNA, expression machinery, a capture scaffold  
98 and EGFP antigen in microfluidic-generated picoliter drops, we assessed the antibody-antigen  
99 interaction along the course of expression (a few hours) inside individual drops. Finally, using  
100 a laser detection system, we determined, at a high-frequency and in a large number of individual  
101 drops, the performance of this picoliter immunoassay in terms of minimum number of DNA  
102 copies per drop, antigen detection limit and capture selectivity.

103

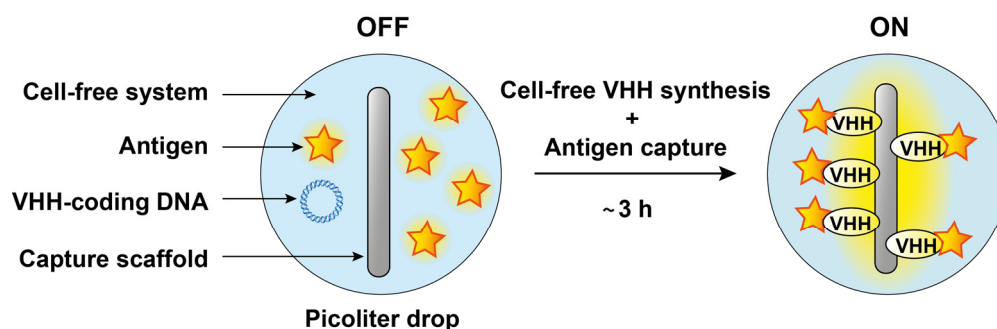

104

105

106 **Figure 1. Cell-free DNA-encoded immunoassay in picoliter drops allows rapid assessment of**  
107 **antibody-antigen binding with minimal components, programmability and DNA instead of**  
108 **purified antibody as starting material.** The concept is based on water-in-oil drops of micrometric size  
109 containing cell-free expression mix, fluorescent antigen, VHH-coding DNA and a capture scaffold  
110 capable to attach the antibody (VHH) upon the synthesis. The resulting emulsion is incubated at 37°C  
111 for 3 h during which the VHH is cell-free synthesized, is tethered onto the capture scaffold and binds  
112 the antigen in case of sufficient antibody-antigen affinity. This binding alters the distribution of antigen  
113 within the drop, from unbound antigen producing a homogeneous fluorescent signal (OFF) to antigen  
114 accumulated on the capture scaffold, resulting in a local increase in fluorescence intensity (ON).

115

## 116 Results and discussion

117 Figure 1 depicts the central concept of our approach. It consists in encapsulating in the same  
118 picoliter compartment, the minimal components necessary to both synthesize a desired VHH  
119 and characterize *in situ* its binding affinity for a target antigen. Water-in-oil drops are used to  
120 encapsulate a small number of DNA coding for the VHH, a cell-free expression medium to  
121 synthesize the VHH from DNA and specific and/or dummy antigen(s). To detect the VHH-  
122 antigen binding, the strategy consists in implementing a capture scaffold onto which VHH are  
123 tethered upon their cell-free synthesis. As a result, target antigens, initially homogeneously

124 distributed inside the drop content, accumulate on the VHH-decorated capture scaffold,  
125 resulting, in the case of labelled VHH and/or antigens in a signal accumulation from the  
126 antibodies and/or its bound antigens. This concept combines several advantages. No cell is  
127 involved, avoiding all steps of cell maintenance, and expanding the range of conditions that can  
128 be explored. All components in the drops are supplied in a known and prescribed concentration,  
129 offering reliability and robustness. The duration of the whole assay, starting from the DNA  
130 encapsulation to the detection of the antigen-binding, is mainly determined by the cell-free  
131 expression reaction rate, and is thus of the order of a few hours only. Finally, using VHH-coding  
132 DNA as starting material enables easy applicability to virtually any kind of VHH sequence  
133 while the micrometric drop format offers immediate compatibility with microfluidic handling,  
134 such as high-throughput drop production, testing and sorting. To demonstrate this concept, we  
135 focused on a few important key-steps: picoliter drop production and encapsulation of the  
136 minimal assay, *in situ* VHH synthesis and concomitant antigen-binding analysis, and high-  
137 frequency analysis in a large number of flowing drops. As a model antigen, we mainly used  
138 enhanced green fluorescent protein (EGFP), a commonly used and fluorescent target. We  
139 associated it to an anti-GFP VHH, referred here to as NanoGFP<sup>[46]</sup> which was encoded in the  
140 encapsulated DNA. For the cell-free VHH synthesis, we focused on reconstituted PURE  
141 expression system,<sup>[47]</sup> a minimal set of recombinant components purified from *E. coli*, for their  
142 well-known composition, fast protein synthesis and commercial availability.

143

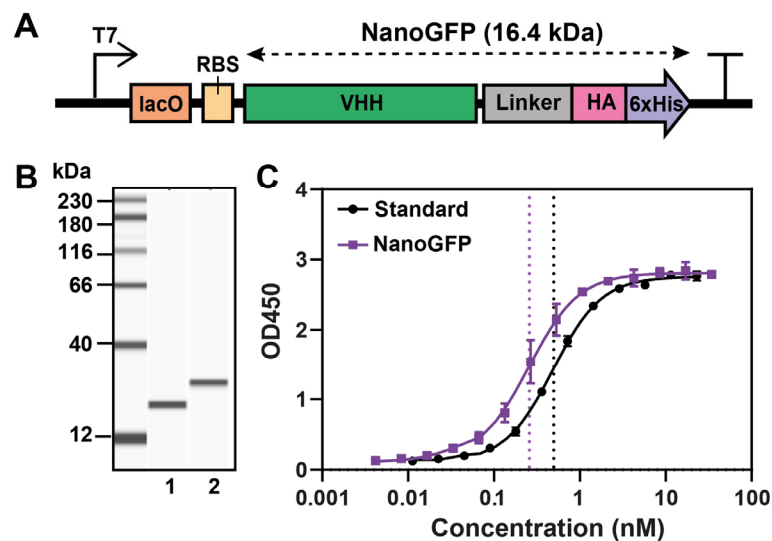

144

145 **Figure 2. Characterization of anti-GFP VHH, called NanoGFP, expressed by PURExpress® in**  
146 **bulk format.** A) Schematic representation of the DNA template used for NanoGFP cell-free expression.  
147 The template contains T7 promoter, lac operator (lacO) and ribosome binding site (RBS) located  
148 upstream of the gene coding for NanoGFP (16.4 kDa), composed of VHH-coding gene separated by a  
149 linker from HA epitope tag and 6xHistidine tag, followed by a T7 terminator. B) Capillary western blot  
150 analysis of commercially available anti-GFP VHH (lane 1) and cell-free expressed NanoGFP (lane 2).  
151 C) Dose-response curves of commercially available anti-GFP VHH (Standard) and cell-free expressed  
152 NanoGFP. The curves were obtained by indirect ELISA, using EGFP antigen for VHH capture and an  
153 anti-VHH peroxidase-conjugated IgG for detection. Dotted lines indicate the apparent dissociation  
154 constant, for the standard:  $K_D^{app} = 0.49 \pm 0.03$  nM and for the NanoGFP:  $K_D^{app} = 0.26 \pm 0.03$  nM.  
155 NanoGFP was expressed at  $[DNA] = 4 \text{ ng} \cdot \mu\text{L}^{-1}$ , 37°C, 3 h.

156 Prior to drop encapsulation, we characterized the amount of NanoGFP that could be synthesized  
157 by PURExpress® in bulk and further tested its antigen recognition capability. To this end, we  
158 designed a plasmid containing the necessary elements for transcription and translation in PURE  
159 system (T7 promoter, ribosome binding site (RBS) and T7 terminator) around the gene coding  
160 for VHH and hemagglutinin (HA) tag separated by a linker region (Fig. 2A). For the VHH, we  
161 used a sequence previously optimized for expression in *E. coli*.<sup>[46]</sup> The HA tag, designed for  
162 tethering the synthesized protein onto the signal amplification scaffold, was positioned in the  
163 C-terminus to minimize any possible effect on the antigen binding at the VHH paratope  
164 region<sup>[48]</sup> This fusion increased the protein molecular weight by 2 kDa only, leading to an overall  
165 size of 16.4 kDa. The resulting plasmid was incorporated into a conventional PURExpress®  
166 mix and incubated at 37 °C for 3 hours in a tube. Capillary western blot analysis of the product  
167 revealed a sharp single band, showing that the synthesized NanoGFP was properly produced  
168 and as full-length monomers only (Fig. 2B). Its position was slightly above that obtained with  
169 a commercially available anti-GFP VHH of 13.9 kDa, in agreement with its expected size.  
170 ELISA titration revealed a yield of  $15.3 \pm 2.0 \mu\text{g}\cdot\text{mL}^{-1}$  of synthesized NanoGFP in  
171 PURExpress® (Fig. S1). Replacing PURExpress® by PUREflex®, another PURE cell-free  
172 expression medium, resulted in successful yet lower-yield NanoGFP synthesis. Furthermore,  
173 adding supplements such as disulfide bond enhancer or chaperones did not improve the yield  
174 (Fig. S1), showing the interest of working with short-sized and simply structured proteins such  
175 as VHH. We next confirmed the binding activity of the cell-free produced VHH. To this end  
176 we follow the binding of EGFP as a function of NanoGFP concentration to establish the dose-  
177 response curve (Fig. 2C). The method was validated with a commercially available VHH  
178 (unknown complementarity determining region – CDR – sequences) leading to an apparent  
179 dissociation constant  $K_D^{app} = 0.49 \pm 0.03 \text{ nM}$ . Interestingly the cell-free expressed NanoGFP  
180 led to a similar value  $K_D^{app} = 0.26 \pm 0.03 \text{ nM}$ , which was also in the same range as what was  
181 reported with the same VHH produced in bacteria.<sup>[39,49]</sup> All these results show that cell-free  
182 synthesis in PURExpress® system produced functional NanoGFP at conventional yield and  
183 expected binding affinity. We next exploited the DNA-encoding approach of our strategy and  
184 applied it to explore the cell-free synthesis of other VHH sequences. We started with several  
185 anti-GFP variants known for their different binding affinities and showing significant sequence  
186 diversity especially in the CDR3 region (Fig. S2). Interestingly, all synthesized VHH also  
187 displayed a single and well-defined band in Western analysis and with ELISA titration ranging  
188 from  $2.6 \pm 0.1$  to  $60.7 \pm 10.0 \mu\text{g}\cdot\text{mL}^{-1}$ , with PUREflex® leading to similar results with lower  
189 yields of expression (Fig. S3). Dose-response analysis in the accessible concentration range  
190 showed functional binding activity of the synthesized mutants (Fig. S4). Using a cell-free  
191 expression medium from *E. coli* purified components was thus found to be a valuable strategy  
192 to synthesize significant amounts of functional anti-GFP VHH in bulk, in one step and in a few  
193 hours only, while allowing to explore various VHH sequences by simply modifying its  
194 encoding DNA.

195

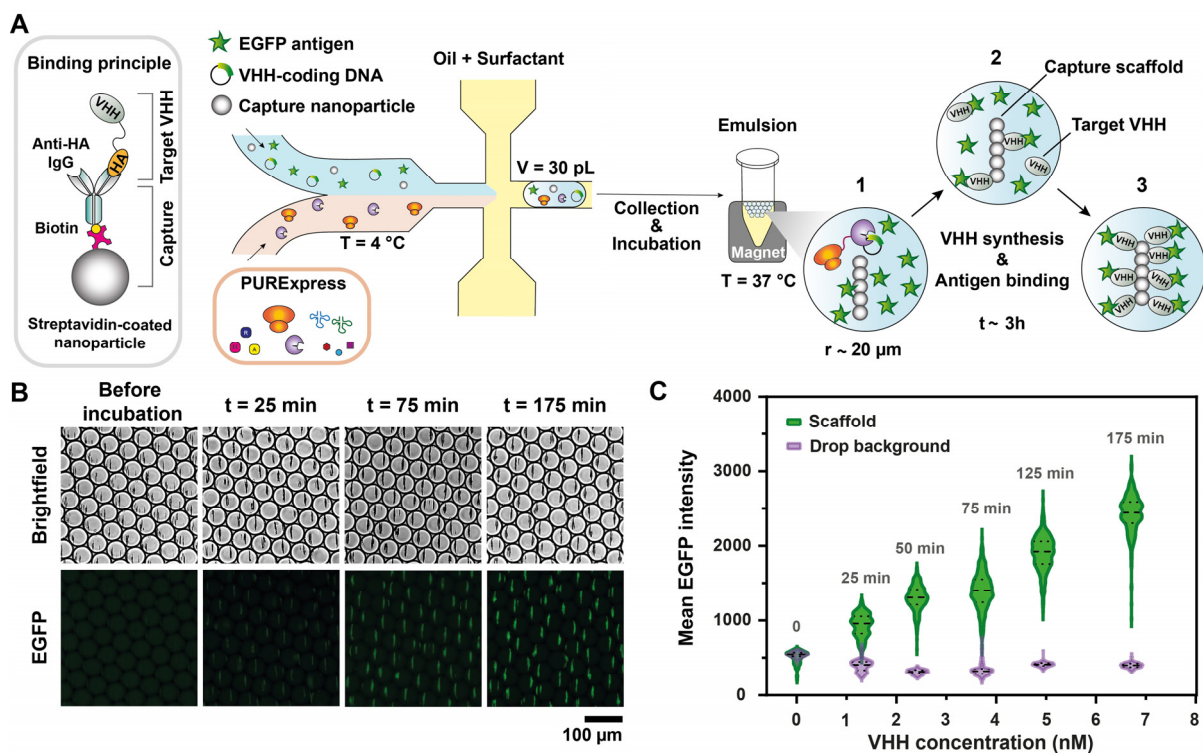

196

197 **Figure 3. DNA-encoded immunoassay produced by microfluidics and performed with DNA**  
 198 **coding for NanoGFP, allows for real-time *in situ* observation of VHH:EGFP binding thanks to**  
 199 **accumulation of the complex on the capture scaffold.** A) Microfluidic workflow for immunoassay  
 200 preparation and the mechanism of formation of fluorescent readout. Streptavidin-coated magnetic  
 201 nanoparticles (300 nm in diameter) were functionalized with biotin-conjugated anti-HA IgG to allow  
 202 the capture of target VHH and suspended in a solution containing VHH-coding DNA ( $\lambda = 300$  plasmids  
 203 per drop) and EGFP (40 nM). The mix was injected in a droplet generator with a flow-focusing geometry,  
 204 in a co-flow with PURExpress® (400  $\mu\text{L}\cdot\text{h}^{-1}$ ) and emulsified by fluorinated oil with 2% fluorosurfactant  
 205 (1400  $\mu\text{L}\cdot\text{h}^{-1}$ ), resulting into monodisperse drops of  $\sim 30$  pL. The collected emulsion was incubated at  
 206 37 °C under a magnetic field to align the magnetic nanoparticles and during 3 h the VHH was  
 207 progressively synthesized (1) and tethered on the capture scaffold together with its bound EGFP (2)  
 208 which produced a bright and localized fluorescence signal (3). B) VHH expression and antigen binding  
 209 followed by fluorescence microscopy. After encapsulation, the emulsion was injected into a glass  
 210 microfluidic chamber and imaged before and during incubation at 37 °C. C) Violin plot of the mean  
 211 EGFP intensity distribution measured on the scaffold and in the drop background as a function of  
 212 synthesized VHH concentration measured by sandwich ELISA on a broken emulsion. Mean EGFP  
 213 intensity of 300 droplets was assessed by particle analysis on background-subtracted images (dashed  
 214 line: median, dotted lines: lower and upper quartiles). The time of incubation is indicated above each  
 215 distribution.

216

217 Experiments described before involved reaction volumes of about 25  $\mu\text{L}$  and a large number of  
 218 DNA copies per reaction ( $10^{10}$ ). To establish a DNA-encoded immunoassay in  $10^6$ -time smaller  
 219 volumes (Fig. 1), we had to devise a method to confine a small number of VHH-coding DNA  
 220 molecules in highly miniaturized containers and implement a method allowing to detect *in situ*  
 221 the functionality of the synthesized VHH. The strategy was to use a microfluidic device to  
 222 produce picoliter drops co-encapsulating VHH-coding DNA, the cell-free expression medium,  
 223 the EGFP antigen and a capture scaffold allowing to analyze the binding of the antigen to the  
 224 VHH synthesized *in situ* (Fig. 3). This binding was assessed using a capture nanoparticle made

225 of a streptavidin-coated superparamagnetic bead previously functionalized with a biotinylated  
226 IgG specific to the HA tag in the C-terminus of the target synthesized VHH (Fig. 3A, *left*). The  
227 capture nanoparticles were assembled together with the VHH-coding DNA and the EGFP  
228 antigen. This mix and PURExpress® expression medium were injected at 4 °C as the two  
229 aqueous phases co-flowing in a microfluidic-device where drops were generated at a flow-  
230 focusing junction with a fluorinated oil supplemented with fluorinated surfactants to ensure  
231 non-coalescence of the produced drops<sup>[50]</sup> (Fig. 3A, *middle*). The advantage of using capture  
232 particles of nanometric dimensions (~ 300 nm in diameter) was to enable working at a  
233 concentration high enough to avoid heterogenous distribution (Poisson partitioning) while  
234 offering a large surface area for binding. Our device typically produced  $2.5 \cdot 10^6$  drops of  
235  $30 \pm 3$  pL of narrow polydispersity in 10 min. The resulting emulsion was collected and  
236 immediately incubated at 37 °C under application of a magnetic field resulting in the formation  
237 of a bar of aligned particles<sup>[8]</sup> forming a capture scaffold in each drop (Fig. 3A, *right*).  
238 Microscopic observation on a large number of individual drops in parallel revealed that EGFP  
239 signal was increasing at the position of the assembled capture particles, while vanishing in the  
240 background (Fig. 3B, S5). The characteristic diffusion time for a NanoGFP:EGFP complex of  
241 44.4 kDa was estimated to be 4.5 s (Text S1) using the drop diameter as a characteristic size,  
242 allowing us to follow, with good temporal resolution, the capture of antigen along the course  
243 of VHH expression (Fig. S6A) which is known to be sustained for about 3 h in bulk (Fig. S7).  
244 The same experiment performed without DNA resulted in no signal evolution (Fig. S6B),  
245 demonstrating that the increase of EGFP fluorescence in the presence of the coding DNA was  
246 resulting from accumulation of synthesized VHH binding the antigen. To our knowledge, this  
247 constitutes the first *in situ* observation of antibody-antigen binding in a minimal cell-free system  
248 at picoliter scale. To compare the antigen binding signal evolution to the actual synthesis of  
249 VHH, we determined in each drop the average signal intensity at the particle position and  
250 established its distribution among 300 individual drops as a function of time. We measured  
251 independently the amount of synthesized VHH at each time point using ELISA after breaking  
252 the emulsion. We found that the signal from EGFP accumulated at the capture scaffold was  
253 indeed correlated with the evolution of VHH level along the course of its expression (Fig. 3C).  
254 Interestingly, significant signal concentration could already be observed in less than 30 min.  
255 After 175 min of incubation at 37 °C, a concentration of 6.7 nM of synthesized VHH resulted  
256 in a 5-fold increase of the EGFP signal per drop in average. Note that this assay involved a  
257 number of DNA copies per drop  $\lambda = 300$ . Cell-free expression at the same DNA concentration  
258 in bulk led to a yield of 4.9 nM of synthesized VHH after the same incubation time, emphasizing  
259 that the encapsulation strategy did not hamper and may even favor the *in situ* protein synthesis.  
260 All these results show that squeezing anti-GFP VHH-coding DNA, its target antigen and a  
261 capture scaffold in microfluidic-generated picoliter drops allows one to quickly achieve VHH  
262 synthesis and concomitantly assess its functional binding.

263 After characterizing a large ensemble of drops in parallel, we sought after sequential analysis  
264 of individual drops at a high frequency offering, for instance, the capability to detect rare events  
265 in real time. This method was implemented not only to characterize the performance of the  
266 assay but also to devise a method that could be readily compatible with *in situ* sorting. To this  
267 end, we injected the cell-free expression emulsion after 3 h incubation into another microfluidic  
268 device integrating side oil channels to separate the drops and a laser-assisted *in situ* fluorescence  
269 measurement (Fig. 4A, *left*). In this system, the whole width of the channel was laser-  
270 illuminated to ensure uniform profile of each drop flowing through the measurement window

271

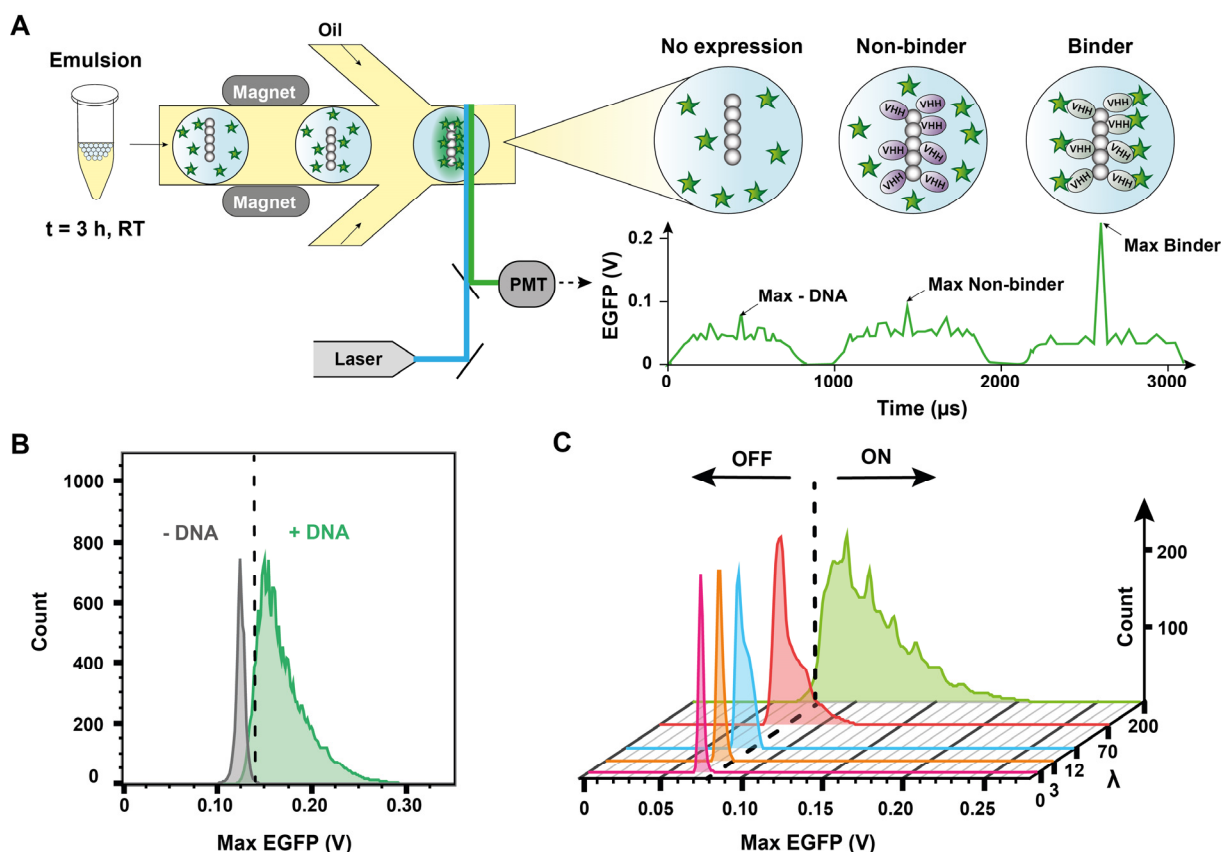

272

273 **Figure 4. Sequential analysis of a large number of droplets reveals VHH-antigen binding can be**  
 274 **detected with DNA concentrations as low as  $\lambda = 12$  plasmids per drop.** A) Laser and PMT-equipped  
 275 microfluidic platform provides a means to differentiate droplets containing target antibodies (binder  
 276 VHH) from the rest (not expressed or non-binder VHH). After 3h at 37°C the emulsion is injected at RT  
 277 into droplet analysis device with magnets used to align the capture scaffolds. Drops are spaced by  
 278 fluorinated oil with 0.5% of fluorosurfactant ( $f = 250$  Hz), excited by a 488 nm laser. Emitted photons  
 279 are converted by a PMT into an electrical signal EGFP (V), displayed as a function of time. Droplets  
 280 containing binder VHHs showed a higher maximal EGFP intensity (Max EGFP) due to accumulation  
 281 of EGFP on the linear capture scaffold and are defined as positive. B) Max EGFP distributions of  
 282 negative control (- DNA,  $\lambda = 0$ ) and emulsion with DNA coding for NanoGFP (+DNA,  $\lambda = 300$ ). Highest  
 283 Max EGFP detected for - DNA was fixed as the threshold above which droplets were considered as  
 284 positive (dashed line). C) Max EGFP distributions for  $\lambda = 0, 3, 12, 70$  and 200. All emulsions contained  
 285 EGFP (40 nM). The exact numbers of analyzed droplets (Table S1) with fractions of positivity per  
 286 condition (Fig. S9) are available in SI.

287

288 and the fluorescence emission was recorded by a photomultiplier tube (PMT) detector. The  
 289 detection of the maximum intensity in each drop fluorescence profile, referred to as Max EGFP,  
 290 allowed us to discriminate between situations such as no detectable VHH expression (e.g., due  
 291 to absence of DNA or low-yield synthesis), expression of non-binding VHH (e.g., lack of  
 292 affinity), and successful synthesis of functional VHH (Fig. 4A, right). In the first two cases,  
 293 Max EGFP was in the range of the background EGFP signal, while the presence of the  
 294 functional VHH was characterized by a Max EGFP value superior to the fluorescent  
 295 background produced by unbound EGFP. Drops were analyzed at a typical frequency of 500 Hz,



296 offering the possibility to explore a pool of thousands drops in a few seconds only. In particular,  
297 we analyzed the drop population produced under the conditions of Fig. 3 and analyzed the  
298 distribution of Max EGFP, with or without VHH-coding DNA ( $\lambda = 300$ , Fig. 4B). Without  
299 DNA, the distribution was very sharp and at low Max EGFP values, allowing us to define a  
300 threshold (dashed line) above which larger values of Max EGFP would indicate the presence  
301 of the produced VHH binding its fluorescent antigen (positive drops). Interestingly, with DNA  
302 the signal was more broadly distributed and the majority of drops (92 %) were above the binding  
303 threshold, demonstrating both successful synthesis of functional VHH as well as a good  
304 sensitivity of the detection method. In this assay, it was important to optimize the EGFP  
305 concentration as the performance of the detection resulted from a tradeoff between antigen  
306 amount sufficient to ensure binding detection and low enough to avoid a too strong background  
307 inside the drop. For this purpose, we determined how EGFP concentration at a fixed  $\lambda = 300$   
308 affected the distributions of Max EGFP values and we selected a concentration of 40 nM for  
309 which positive drops displayed particularly high signal compared to the background (Fig. S8).  
310 We then assessed the minimum number of DNA copies per drop that could be used at this EGFP  
311 concentration for the assay to remain applicable. We thus performed our analysis on different  
312 emulsions produced with a varying VHH-coding DNA concentration (Fig. 4C, Figs. S9). We  
313 found that positive drops could be detected at concentrations as low as  $\lambda = 12$ , the fraction of  
314 positive drops significantly increasing with an increase in  $\lambda$ . This correlates with the amount of  
315 VHH produced in drops. For instance, the VHH concentration for  $\lambda = 12$  was measured to be  
316 0.24 nM, which is about 30 times less than with  $\lambda = 300$ . Notably, at such a low concentration,  
317 the fraction of NanoGFP ( $K_D^{app} = 0.26 \pm 0.03$  nM) bound to its antigen can be estimated to be  
318 48%, showing that the detection limit is a signature of inherent VHH affinity. To further  
319 demonstrate the applicability of this assay we added a secondary fluorescent antibody conjugate  
320 specific to GFP. By performing the same single-drop analysis on both fluorescent signals (Fig.  
321 S10) we found that 79% of drops presented secondary antibody signal above the threshold,  
322 when 89% of this population displayed EGFP signal above threshold. This shows the possibility  
323 of multiplexing the assay as well as a way to detect non fluorescent antigens. All these results  
324 demonstrate the capability of this method to sequentially analyze large numbers of single drops  
325 containing only several copies of VHH-coding DNA and determine the VHH functionality  
326 against virtually any kind of antigens, inherently fluorescent or not.

327 All previous experiments involved a single type of antigen-antibody interaction. To investigate  
328 the specificity of cell-free synthesized VHH, we performed the sequential analysis method in  
329 the presence of several antigens. As a proof of concept, we encapsulated simultaneously EGFP  
330 and the red fluorescent protein mCherry in the drops and we measured both green (EGFP) and  
331 red (mCherry) fluorescent signals in the presence of different VHH-coding DNA (Fig. 5). With  
332 DNA coding for NanoGFP, the majority of drops (85%) were positive in the green channel  
333 while all the drops showed negative signal in the red channel, meaning selective  
334 NanoGFP:EGFP binding (Fig. 5, *top*). Conversely, with the same amount of DNA ( $\lambda = 300$ )  
335 but coding for anti-mCherry VHH (LaM-4)<sup>[51]</sup>, positive drops were detected with red channel  
336 only (43%, Fig. 5, *middle*). The lower proportion of positive drops for red signal is likely  
337 attributed to the lower yield of expression of LaM-4 ( $2.8 \pm 0.6$   $\mu\text{g}\cdot\text{mL}^{-1}$  in bulk, Fig. S3), which  
338 is approximately 5 times less than that of NanoGFP, and the lower brightness of its mCherry  
339 antigen. Without DNA (Fig. 5, *bottom*) no positive signal was detected in neither of channels  
340 confirming that the positive peaks in the presence of DNA evidenced selective antigen binding.

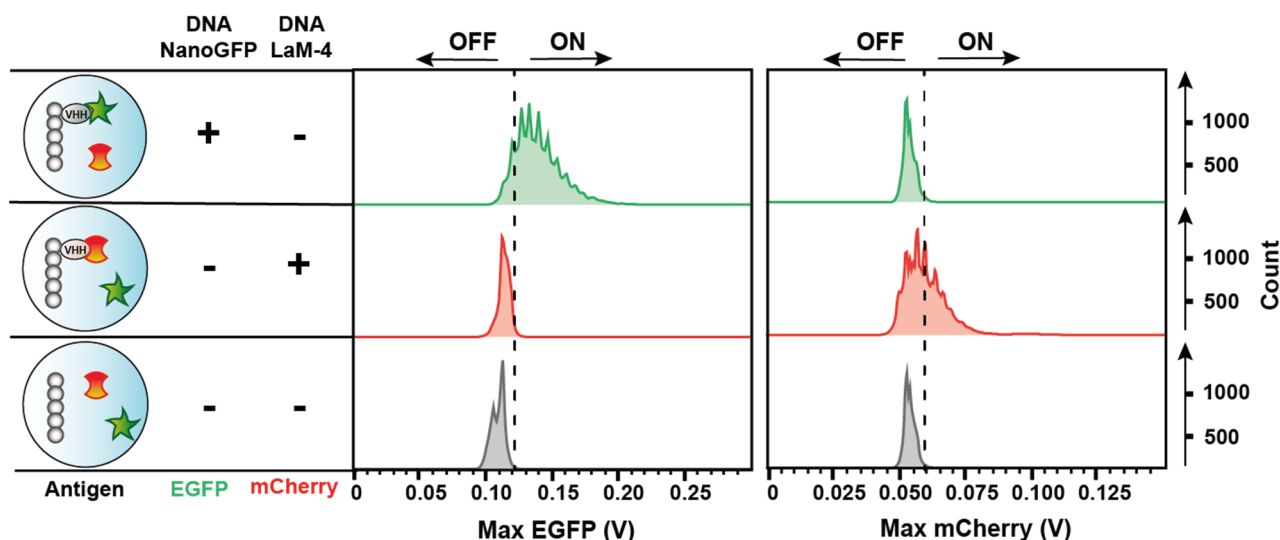

341 **Figure 5. Cell-free expressed NanoGFP and LaM-4 present selective antigen binding in the**  
 342 **presence of both their target antigens (EGFP and mCherry, respectively).** Emulsions with DNA  
 343 coding for NanoGFP (top row), DNA coding for LaM-4 (middle row), and without DNA (bottom row),  
 344 all containing both EGFP (40 nM) and mCherry (80 nM), were incubated for 3 h at 37°C and analyzed  
 345 using 488 nm and 561 nm lasers. The detection thresholds (dashed lines) for both channels were  
 346 determined by the highest Max EGFP and Max mCherry detected in emulsion without DNA. The exact  
 347 numbers of analyzed droplets are available in SI (Table S1).

348

## 349 Conclusion

350 We have demonstrated the possibility to perform an immunoassay using a VHH-coding DNA  
 351 as a starting material instead of a purified antibody as it is conventionally done. By removing  
 352 all cell handling and purification steps, functional VHH was synthesized by cell-free expression  
 353 and its capability to bind its specific antigen was directly characterized *in situ*. The whole  
 354 process took a maximum of 3 hours, with binding detectable in less than 30 min, and required  
 355 minimal amounts of materials and reagents. The assay was performed inside water-in-oil  
 356 picoliter drops encapsulating the coding DNA, a cell-free expression medium with purified  
 357 components from *E. coli* (PURExpress®, PUREfrex®), the target antigen, and magnetic  
 358 particles accumulating on their surface the synthesized VHH binding its antigen. Simply  
 359 incubating such microcompartments at 37 °C under a magnetic field allowed us to follow the  
 360 accumulation of the antigen signal on the self-assembled nanoparticles and therefore assess for  
 361 the first time the functionality of a cell-free expressed VHH binding its antigen. The  
 362 hemagglutinin (HA)-tag was conveniently used as a generic and easy-to-implement way to link  
 363 the synthesized VHH to the particles but other conjugation methods could be envisioned.  
 364 Similarly, we chose magnetic nanoparticles for their large surface area of binding and capability  
 365 to self-assemble under command once encapsulated to avoid Poisson partitioning, but other  
 366 capture scaffolds could be used as well. The concept of the immunoassay was demonstrated  
 367 here mainly using a DNA coding for an anti-GFP VHH and the corresponding EGFP antigen.  
 368 Using DNA instead of a preliminarily purified antibody confers to the method a unique degree  
 369 of programmability that was demonstrated with the successful cell-free synthesis and  
 370 characterization of different mutants against the same antigen as well as VHH targeting other  
 371 antigens (mCherry). By simply adapting the DNA sequence, the method thus offers not only  
 372 the possibility to virtually implement any VHH but also to modify them in a highly tunable

373 manner (e.g., tag addition, artificial amino acid incorporation, protein truncation/fusion). We  
374 also showed that the antigen detection was operational with antigens that can be inherently  
375 fluorescent (here, EGFP, mCherry) or not (secondary antibody labelling). For a fully DNA-  
376 encoded approach, we are also currently implementing the *in situ* cell-free expression of the  
377 antigen itself (data not shown). The panel of antibody-antigen interactions that can be explored  
378 with this method thus appears to be potentially extremely large. The microfluidic format of the  
379 assay (drop generating device) only requires standard device fabrication and set-ups, thus being  
380 implementable in a broad variety of environments, while offering the possibility to work with  
381 minimal amounts of reagents at a high speed. We have shown in particular that the picoliter  
382 drops containing the DNA-encoded immunoassay could be analyzed individually, in a parallel  
383 or sequential manner, at a high frequency (500 Hz) and with amounts of DNA as low as 12  
384 copies per drop. In a synthetic biology context, this work reveals a new facet of cell-free  
385 expression that now enables the study of antibody-antigen interaction in a drastically simplified  
386 yet highly programmable format. From a biotechnological point of view, this study describes a  
387 methodological paradigm shift in immunoassay where genetically active synthetic  
388 microcompartments produce and directly report the binding activity of their encoded antibody,  
389 thus constituting a promising tool for faster discovery and improved implementation of  
390 antibodies.

391

## 392 **Funding**

393 This work was supported by the National Association of Research Technology ANRT (CIFRE  
394 contract 2020/1044), the French National Research Agency ANR (DYOR, contract ANR-18-  
395 CE06-0019) and “Institut Pierre-Gilles de Gennes” (laboratoire d’excellence) and  
396 “Investissements d’avenir” program ANR-10-IDEX-0001-02 PSL, ANR-10-LABX-31 and  
397 ANR-10-EQPX-34.

398

## 399 **Acknowledgement**

400 We thank Nathalie Coulteaut (Sanofi) and Frédéric Lacroix (Sanofi) for providing access to  
401 equipment and experimental support; Vasily Shenshin (Sanofi) for assistance in microfluidic  
402 handling; Micaela Vitor (Sanofi), H el ene Erasmus (Sanofi) and Samy Dehissi (Sorbonne  
403 Universit e) for helpful scientific discussions.

404

## 405 **Conflict of interest**

406 The authors declare no conflict of interest.

407

408

409

410

411

## 412 **References**

413

414 [1] I. Sela-Culang, V. Kunik, Y. Ofran, *Front. Immunol.* 2013, 4, 302.

415 [2] I. A. Darwish, *Int. J. Biomed. Sci.* 2006, 2, 217–35.

416 [3] A. H. Laustsen, V. Greiff, A. Karatt-Vellatt, S. Muyltermans, T. P. Jenkins, *Trends*  
417 *Biotechnol.* 2021, 39, 1263–1273.

418 [4] S. Vyawahare, A. D. Griffiths, C. A. Merten, *Chem. Biol.* 2010, 17, 1052–1065.

419 [5] B. Kintsjes, L. D. van Vliet, S. R. A. Devenish, F. Hollfelder, *Curr. Opin. Chem. Biol.*  
420 2010, 14, 548–555.

421 [6] T. M. Tran, F. Lan, C. S. Thompson, A. R. Abate, *J. Phys. D: Appl. Phys.* 2013, 46,  
422 114004.

423 [7] L. Mazutis, J. Gilbert, W. L. Ung, D. A. Weitz, A. D. Griffiths, J. A. Heyman, *Nat.*  
424 *Protoc.* 2013, 8, 870–891.

425 [8] K. Eyer, R. C. L. Doineau, C. E. Castrillon, L. Briseño-Roa, V. Menrath, G. Mottet, P.  
426 England, A. Godina, E. Brient-Litzler, C. Nizak, A. Jensen, A. D. Griffiths, J. Bibette, P.  
427 Bruhns, J. Baudry, *Nat. Biotechnol.* 2017, 35, 977–982.

428 [9] A. Gérard, A. Woolfe, G. Mottet, M. Reichen, C. Castrillon, V. Menrath, S. Ellouze, A.  
429 Poitou, R. Doineau, L. Brisenro-Roa, P. Canales-Herrerias, P. Mary, G. Rose, C. Ortega, M.  
430 Delincé, S. Essono, B. Jia, B. Iannascoli, O. R.-L. Goff, R. Kumar, S. N. Stewart, Y. Pousse,  
431 B. Shen, K. Grosselin, B. Saudemont, A. Sautel-Caillé, A. Godina, S. McNamara, K. Eyer, G.  
432 A. Millot, J. Baudry, P. England, C. Nizak, A. Jensen, A. D. Griffiths, P. Bruhns, C. Brenan,  
433 *Nat. Biotechnol.* 2020, 38, 715–721.

434 [10] A. D. Silverman, A. S. Karim, M. C. Jewett, *Nat. Rev. Genet.* 2020, 21, 151–170.

435 [11] E. D. Carlson, R. Gan, C. E. Hodgman, M. C. Jewett, *Biotechnol. Adv.* 2012, 30, 1185–  
436 1194.

437 [12] A. S. M. Salehi, M. T. Smith, A. M. Bennett, J. B. Williams, W. G. Pitt, B. C. Bundy,  
438 *Biotechnol. J.* 2016, 11, 274–281.

439 [13] S. H. Hong, I. Ntai, A. D. Haimovich, N. L. Kelleher, F. J. Isaacs, M. C. Jewett, *ACS*  
440 *Synth. Biol.* 2014, 3, 398–409.

441 [14] A. Estévez-Torres, C. Crozatier, A. Diguet, T. Hara, H. Saito, K. Yoshikawa, D. Baigl,  
442 *Proc. Natl. Acad. Sci.* 2009, 106, 12219–12223.

443 [15] D. Kim, T. Kigawa, C. Choi, S. Yokoyama, *Eur. J. Biochem.* 1996, 239, 881–886.

444 [16] D. Kim, J. R. Swartz, *Biotechnol. Bioeng.* 2004, 85, 122–129.

- 445 [17] A. Venancio-Marques, Y. J. Liu, A. Diguët, T. D. Maio, A. Gautier, D. Baigl, *ACS Synth.*  
446 *Biol.* 2012, *1*, 526–531.
- 447 [18] V. Noireaux, A. Libchaber, *Proc. Natl. Acad. Sci.* 2004, *101*, 17669–17674.
- 448 [19] R. Kalmbach, I. Chizhov, M. C. Schumacher, T. Friedrich, E. Bamberg, M. Engelhard, *J.*  
449 *Mol. Biol.* 2007, *371*, 639–648.
- 450 [20] M. Kaneda, S. M. Nomura, S. Ichinose, S. Kondo, K. Nakahama, K. Akiyoshi, I. Morita,  
451 *Biomaterials* 2009, *30*, 3971–3977.
- 452 [21] Y. J. Liu, G. P. R. Hansen, A. Venancio-Marques, D. Baigl, *ChemBioChem* 2013, *14*,  
453 2243–2247.
- 454 [22] J. B. Huppa, H. L. Ploegh, *J. Exp. Med.* 1997, *186*, 393–403.
- 455 [23] H. Asahara, S. Chong, *Nucleic Acids Res.* 2010, *38*, e141.
- 456 [24] D. Matthies, S. Haberstock, F. Joos, V. Dötsch, J. Vonck, F. Bernhard, T. Meier, *J. Mol.*  
457 *Biol.* 2011, *413*, 593–603.
- 458 [25] J. Shin, P. Jardine, V. Noireaux, *ACS Synth. Biol.* 2012, *1*, 408–413.
- 459 [26] P. van Nies, I. Westerlaken, D. Blanken, M. Salas, M. Mencia, C. Danelon, *Nat.*  
460 *Commun.* 2018, *9*, 1583.
- 461 [27] P. S. Dittrich, M. Jahnz, P. Schwille, *ChemBioChem* 2005, *6*, 811–814.
- 462 [28] M. Hase, A. Yamada, T. Hamada, D. Baigl, K. Yoshikawa, *Langmuir* 2007, *23*, 348–  
463 352.
- 464 [29] F. Courtois, L. F. Olguin, G. Whyte, D. Bratton, W. T. S. Huck, C. Abell, F. Hollfelder,  
465 *ChemBioChem* 2008, *9*, 439–446.
- 466 [30] A. Sepp, D. S. Tawfik, A. D. Griffiths, *FEBS Lett.* 2002, *532*, 455–458.
- 467 [31] A. D. Griffiths, D. S. Tawfik, *EMBO J.* 2003, *22*, 24–35.
- 468 [32] H. M. Cohen, D. S. Tawfik, A. D. Griffiths, *Protein Eng. Des. Sel.* 2004, *17*, 3–11.
- 469 [33] A. Fallah-Araghi, J. C. Baret, M. Ryckelynck, A. D. Griffiths, *Lab Chip* 2012, *12*, 882–  
470 891.
- 471 [34] Y. Hori, C. Katak, R. M. Murray, A. R. Abate, *Lab Chip* 2017, *17*, 3037–3042.
- 472 [35] G. Yin, E. D. Garces, J. Yang, J. Zhang, C. Tran, A. R. Steiner, C. Roos, S. Bajad, S.  
473 Hudak, K. Penta, J. Zawada, S. Pollitt, C. J. Murray, *MAbs* 2012, *4*, 217–225.
- 474 [36] M. Stech, S. Kubick, *Antibodies* 2015, *4*, 12–33.

- 475 [37] S. Murakami, R. Matsumoto, T. Kanamori, *Sci. Rep.* 2019, 9, 671.
- 476 [38] C. Hamers-Casterman, T. Atarhouch, S. Muyldermans, G. Robinson, C. Hammers, E. B.  
477 Songa, R. Hammers, N. Bendahman, *Nature* 1993, 446–448.
- 478 [39] U. Rothbauer, K. Zolghadr, S. Tillib, D. Nowak, L. Schermelleh, A. Gahl, N. Backmann,  
479 K. Conrath, S. Muyldermans, M. C. Cardoso, H. Leonhardt, *Nat. Methods* 2006, 3, 887–889.
- 480 [40] U. Rothbauer, K. Zolghadr, S. Muyldermans, A. Schepers, M. C. Cardoso, H. Leonhardt,  
481 *Mol. Cell Proteomics* 2008, 7, 282–289.
- 482 [41] M. Scully, S. R. Cataland, F. Peyvandi, P. Coppo, P. Knöbl, J. A. K. Hovinga, A.  
483 Metjian, J. de la Rubia, K. Pavenski, F. Callewaert, D. Biswas, H. D. Winter, R. K. Zeldin, H.  
484 Investigators, *New Engl. J. Med.* 2019, 380, 335–346.
- 485 [42] S. Sun, Z. Ding, X. Yang, X. Zhao, M. Zhao, L. Gao, Q. Chen, S. Xie, A. Liu, S. Yin, Z.  
486 Xu, X. Lu, *Int. J. Nanomed.* 2021, 16, 2337–2356.
- 487 [43] Y. Nagumo, K. Fujiwara, K. Horisawa, H. Yanagawa, N. Doi, *J. Biochem.* 2016, 159,  
488 519–526.
- 489 [44] X. Chen, M. Gentili, N. Hacohen, A. Regev, *Nat. Commun.* 2021, 12, 5506.
- 490 [45] I. Zimmermann, P. Egloff, C. A. Hutter, F. M. Arnold, P. Stohler, N. Bocquet, M. N.  
491 Hug, S. Huber, M. Siegrist, L. Hetemann, J. Gera, S. Gmür, P. Spies, D. Gyax, E. R.  
492 Geertsma, R. J. Dawson, M. A. Seeger, *Elife* 2018, 7, e34317.
- 493 [46] M. H. Kubala, O. Kovtun, K. Alexandrov, B. M. Collins, *Protein Sci.* 2010, 19, 2389–  
494 2401.
- 495 [47] Y. Shimizu, A. Inoue, Y. Tomari, T. Suzuki, T. Yokogawa, K. Nishikawa, T. Ueda, *Nat.*  
496 *Biotechnol.* 2001, 19, 751–755.
- 497 [48] S. Muyldermans, *FEBS J.* 2021, 288, 2084–2102.
- 498 [49] D. Saerens, M. Pellis, R. Loris, E. Pardon, M. Dumoulin, A. Matagne, L. Wyns, S.  
499 Muyldermans, K. Conrath, *J. Mol. Biol.* 2005, 352, 597–607.
- 500 [50] C. J. Dejournette, J. Kim, H. Medlen, X. Li, L. J. Vincent, C. J. Easley, *Anal. Chem.*  
501 2013, 85, 10556–10564.
- 502 [51] P. C. Fridy, Y. Li, S. Keegan, M. K. Thompson, I. Nudelman, J. F. Scheid, M. Oeffinger,  
503 M. C. Nussenzweig, D. Fenyö, B. T. Chait, M. P. Rout, *Nat. Methods* 2014, 11, 1253–1260.
- 504
